# Supplementary material for: Analysis of the dynamic relationship between immune profiles and the clinical features of patients with COVID-19
Source: PubMed Central journal article supplement — Ann Transl Med. 2021 Jul;9(14):1118. doi: 10.21037/atm-21-812 (PMC8350647; doi:10.21037/atm-21-812), 2021-07
Supplement: atm-09-14-1118-supplementary.pdf [file atm-09-14-1118-supplementary.pdf]

**Table S1** Basic characteristics in patients with mild and severe COVID-19

| Clinical features                     | All patients (N=80) | Mild (N=21) | Severe (N=59) | P (M vs. S) |
|---------------------------------------|---------------------|-------------|---------------|-------------|
| <b>Characteristics</b>                |                     |             |               |             |
| Age, median (IQR), yr                 | 57 (48-66)          | 50 (35–61)  | 61 (51–70)    | 0.002       |
| Sex, male/female                      | 49:31               | 10:11       | 39:20         | 0.135       |
| <b>Chronic medical illness</b>        |                     |             |               |             |
| Any                                   | 42 (52.50)          | 7 (33.33)   | 35 (59.32)    | 0.041       |
| Cardiovascular disease                | 7 (8.75)            | 1 (4.76)    | 6 (10.17)     | 0.762       |
| Cerebrovascular disease               | 1 (1.25)            | 0 (0.00)    | 1 (1.69)      | 1.000       |
| Chronic kidney disease                | 1 (1.25)            | 0 (0.00)    | 1 (1.69)      | 1.000       |
| Chronic liver disease                 | 6 (7.50)            | 2 (9.52)    | 4 (6.78)      | 1.000       |
| Chronic obstructive pulmonary disease | 4 (5.00)            | 1 (4.76)    | 3 (5.08)      | 1.000       |
| Diabetes                              | 12 (15.00)          | 1 (4.76)    | 11 (18.64)    | 0.240       |
| Hypertension                          | 34 (42.50)          | 3 (14.29)   | 31 (52.54)    | 0.002       |
| Tuberculosis                          | 1 (1.25)            | 0 (0.00)    | 1 (1.69)      | 1.000       |
| <b>Symptoms and signs</b>             |                     |             |               |             |
| Abdominal pain                        | 1 (1.25)            | 0 (0.00)    | 1 (1.69)      | 1.000       |
| Chest stuffiness                      | 7 (8.75)            | 1 (4.76)    | 6 (10.17)     | 0.762       |
| Chills                                | 1 (1.25)            | 0 (0.00)    | 1 (1.69)      | 1.000       |
| Diarrhea                              | 4 (5.00)            | 0 (0.00)    | 4 (6.78)      | 0.521       |
| Dizziness                             | 2 (2.50)            | 0 (0.00)    | 2 (3.39)      | 1.000       |
| Dry cough                             | 39 (48.75)          | 8 (38.10)   | 31 (52.54)    | 0.255       |
| Dry throat                            | 1 (1.25)            | 0 (0.00)    | 1 (1.69)      | 1.000       |
| Expectoration                         | 8 (10.00)           | 1 (4.76)    | 7 (11.86)     | 0.611       |
| Fatigue                               | 9 (11.25)           | 1 (4.76)    | 8 (13.56)     | 0.488       |
| Fever                                 | 70 (87.50)          | 17 (80.95)  | 53 (89.83)    | 0.501       |
| Headache                              | 3 (3.75)            | 0 (0.00)    | 3 (5.08)      | 0.563       |
| Myalgia                               | 10 (12.50)          | 6 (28.57)   | 4 (6.78)      | 0.027       |
| Nausea and vomiting                   | 3 (3.75)            | 0 (0.00)    | 3 (5.08)      | 0.563       |
| Pharyngalgia                          | 1 (1.25)            | 0 (0.00)    | 1 (1.69)      | 1.000       |
| Shortness of breath                   | 12 (15.00)          | 0 (0.00)    | 12 (20.34)    | 0.059       |

Data are presented with median (IQR), Ratio, n (%), in which N is the total number of patients with available data. IQR, interquartile range. P values comparing mild and severe group are obtained by  $\chi^2$  test, Fisher' exact test, or Mann-Whitney U test. yr, year (s).

**Table S2** Biochemical findings in patients with mild and severe COVID-19

| Biochemical Indicators    | Norma Range   | Mild (N=21)            | Severe (N=59)           | Convalescence (N=55)    | P (M vs. S) | P (S vs. C) |
|---------------------------|---------------|------------------------|-------------------------|-------------------------|-------------|-------------|
| Blood Lactic Acid, mmol/L | 0.50-1.60     | 1.50 (1.20-1.70)       | 1.95 (1.60-2.53)        | 1.80 (1.20-2.40)        | 0.003       | 0.070       |
| D-dimer, µg/L FEU         | 0.00-700.00   | 262.50 (175.75-596.00) | 813.00 (363.00-1549.75) | 568.50 (346.00-1222.25) | <0.001      | 0.213       |
| Urea, mmol/L              | 3.60-9.50     | 4.29 (3.35-4.76)       | 6.12 (4.61-8.40)        | 5.57 (4.75-7.88)        | <0.001      | 0.635       |
| Uric acid, µmol/L         | 208.00-428.00 | 237.50 (195.50-334.50) | 220.00 (170.00-282.50)  | 215.00 (166.00-278.25)  | 0.412       | 0.384       |
| Creatinine, µmol/L        | 57.00-111.00  | 66.00 (55.00-89.00)    | 72.00 (64.00-88.00)     | 70.00 (56.25-77.75)     | 0.248       | 0.043       |
| eGFR (EPI-Cr)             |               | 94.41 (77.83-102.23)   | 92.01 (72.32-105.67)    | 98.16 (91.63-105.39)    | 0.724       | 0.055       |
| Globulin, g/L             | 20.00-40.00   | 26.25 (23.35-28.45)    | 28.70 (25.80-33.60)     | 24.90 (21.45-29.80)     | 0.010       | <0.001      |
| Albumin, g/L              | 40.00-55.00   | 44.10 (40.40-46.60)    | 34.55 (31.80-39.10)     | 38.10 (33.60-40.85)     | <0.001      | 0.011       |
| ALT, U/L                  | 9.00-50.00    | 20.00 (13.00-26.00)    | 21.50 (14.00-37.25)     | 40.50 (26.25-61.00)     | 0.342       | <0.001      |
| AST, U/L                  | 15.00-40.00   | 20.00 (18.00-22.00)    | 24.00 (17.00-36.00)     | 21.00 (15.00-25.50)     | 0.043       | 0.003       |
| Total Bilirubin, µmol/L   | 0.00-26.00    | 10.45 (5.58-12.28)     | 10.75 (7.90-17.70)      | 9.80 (6.60-12.40)       | 0.157       | 0.062       |
| Hemoglobin, g/L           | 131.00-172.00 | 135.00 (122.50-147.75) | 133.00 (121.00-146.75)  | 121.00 (104.00-132.50)  | 0.376       | <0.001      |
| Hematocrit, %             | 38.00-50.80   | 40.70 (36.33-43.10)    | 38.60 (34.55-43.10)     | 36.55 (31.33-40.85)     | 0.296       | 0.009       |
| Blood platelet, x10E9/L   | 83.00-303.00  | 187.00 (141.50-271.00) | 189.50 (156.00-232.75)  | 171.50 (118.25-224.75)  | 0.668       | 0.152       |
| Natrium, mmol/L           | 137.00-147.00 | 140.00 (138.00-141.00) | 138.00 (136.00-140.00)  | 140.00 (139.00-142.00)  | 0.015       | 0.001       |
| Potassium, mmol/L         | 3.50-5.30     | 3.69 (3.53-4.15)       | 3.90 (3.59-4.07)        | 3.98 (3.69-4.20)        | 0.459       | 0.197       |
| Total Calcium, mmol/L     | 2.11-2.52     | 2.17 (2.10-2.28)       | 2.06 (1.99-2.17)        | 2.16 (2.06-2.27)        | 0.001       | <0.001      |

Data are presented with median (IQR). N is the total number of patients with available data. IQR, interquartile range. P values are obtained by t test, or Mann-Whitney U test. ALT, alanine aminotransferase. AST, aspartate aminotransferase.

**Table S3** Biochemical findings in dynamic patients with COVID-19

| Biochemical Indicators  | Norma Range   | Hospitalization (N=8)  | Deterioration (N=8)    | Convalescence (N=8)    | P (H vs. D) | P (D vs. C) |
|-------------------------|---------------|------------------------|------------------------|------------------------|-------------|-------------|
| Urea, mmol/L            | 3.60-9.50     | 4.03 (3.03-5.53)       | 7.35 (4.41-8.35)       | 4.78 (4.00-6.23)       | 0.029       | 0.094       |
| Uric acid, µmol/L       | 208.00-428.00 | 265.50 (235.25-348.00) | 224.00 (215.75-235.50) | 254.00 (211.25-328.00) | 0.104       | 0.091       |
| Creatinine, µmol/L      | 57.00-111.00  | 82.50 (76.00-92.50)    | 71.50 (62.50-76.75)    | 67.50 (58.50-69.75)    | 0.007       | 0.178       |
| eGFR (EPI-Cr)           |               | 95.22 (87.03-102.95)   | 105.60 (98.71-121.74)  | 114.19 (99.42-120.92)  | 0.033       | 0.574       |
| Globulin, g/L           | 20.00-40.00   | 27.30 (26.73-31.28)    | 38.35 (26.33-41.80)    | 25.50 (21.45-33.25)    | 0.093       | 0.013       |
| Albumin, g/L            | 40.00-55.00   | 42.05 (38.60-44.98)    | 35.30 (31.00-36.95)    | 39.75 (37.75-41.75)    | 0.001       | 0.006       |
| ALT, U/L                | 9.00-50.00    | 18.50 (12.00-27.75)    | 15.50 (11.00-18.25)    | 48.50 (21.50-71.75)    | 0.325       | 0.161       |
| AST, U/L                | 15.00-40.00   | 20.50 (16.50-27.75)    | 16.50 (13.75-19.00)    | 19.00 (13.25-34.00)    | 0.310       | 0.398       |
| Total Bilirubin, umol/L | 0.00-26.00    | 10.90 (9.70-14.28)     | 12.75 (9.33-22.90)     | 10.70 (8.75-13.28)     | 0.272       | 0.098       |
| Hemoglobin, g/L         | 131.00-172.00 | 150.50 (137.50-153.75) | 133.00 (120.00-136.00) | 128.50 (118.50-135.50) | 0.003       | 0.575       |
| Hematocrit, %           | 38.00-50.80   | 43.30 (41.15-44.93)    | 38.80 (36.38-40.78)    | 38.15 (36.25-40.03)    | 0.004       | 0.662       |
| Blood platelet, x10E9/L | 83.00-303.00  | 151.50 (131.75-184.00) | 243.50 (201.75-271.50) | 223.50 (173.75-284.75) | <0.001      | 0.570       |
| Natrium, mmol/L         | 137.00-147.00 | 139.50 (138.00-140.75) | 136.00 (136.00-138.75) | 140.00 (135.50-141.75) | 0.120       | 0.065       |
| Potassium, mmol/L       | 3.50-5.30     | 3.74 (3.49-3.90)       | 4.26 (3.75-4.75)       | 3.94 (3.77-4.34)       | 0.070       | 0.396       |
| Total Calcium, mmol/L   | 2.11-2.52     | 2.15 (2.06-2.26)       | 2.09 (1.92-2.16)       | 2.20 (2.10-2.28)       | 0.063       | 0.026       |

Data are presented with median (IQR). N is the total number of patients with available data. IQR, interquartile range. P values are obtained by t test, or Wilcoxon test. ALT, alanine aminotransferase. AST, aspartate aminotransferase.

**Table S4** The detailed information about CRRT therapy

| Patients  | Age | Sex    | Life support                | Comorbidities                        | Model  | Duration (h) | Vascular Access Site | Blood Flow (ml/min) | Anticoagulation              | Replacement fluid (ml/h) | Dialysate (ml/h) | Ultrafiltration rate (ml/h) |
|-----------|-----|--------|-----------------------------|--------------------------------------|--------|--------------|----------------------|---------------------|------------------------------|--------------------------|------------------|-----------------------------|
| Patient 1 | 75  | Male   | Mechanical Ventilation+ECMO | Hypertension, diabetes, tuberculosis | CVVH   | 24           | Right femoral vein   | 250                 | Heparin-free/citrate         | 3000                     | 0                | 200                         |
| Patient 2 | 91  | Male   | Mechanical Ventilation      | Hypertension, cardiovascular disease | CVVH   | 24           | Right femoral vein   | 230                 | Low molecular weight heparin | 2000                     | 0                | 150-200                     |
| Patient 3 | 62  | Male   | High-frequency Ventilation  | Hypertension, diabetes               | CVVH   | 8-12         | Right femoral vein   | 220                 | Low molecular weight heparin | 3000                     | 0                | 150-200                     |
| Patient 4 | 82  | Female | Mechanical Ventilation+ECMO | Hypertension, cardiovascular disease | CVVH   | 24           | Right femoral vein   | 230                 | Citrate                      | 3000                     | 0                | 150-200                     |
| Patient 5 | 91  | Male   | Mechanical Ventilation+ECMO | Hypertension                         | CVVHD  | 24           | Right femoral vein   | 160                 | Citrate                      | 1000                     | 1000             | 150                         |
| Patient 6 | 73  | Male   | Mechanical Ventilation+ECMO | Hypertension                         | CVVHDF | 12-24        | Left femoral vein    | 150                 | Heparin-free/citrate         | 2000                     | 0                | 150                         |

CVVH, continuous veno-venous hemofiltration. CVVH, continuous veno-venous hemodialysis. CVVHDF, continuous veno-venous hemodiafiltration.

**Table S5** Immune findings in patients with COVID-19 who received CRRT therapy

| Immune Findings                     | Norma Range    | CRRT_0w (N=6)             | CRRT_1w (N=6)             | CRRT_2w (N=6)             | CRRT_3w (N=6)             | P (0 vs. 1w) | P (0 vs. 2w) | P (0 vs. 3w) |
|-------------------------------------|----------------|---------------------------|---------------------------|---------------------------|---------------------------|--------------|--------------|--------------|
| <b>Infection-related Biomarkers</b> |                |                           |                           |                           |                           |              |              |              |
| hs-CRP, mg/L                        | 0.00-8.00      | 100.88 (51.59-155.74)     | 83.42 (42.81-183.37)      | 78.51 (26.99-135.28)      | 70.82 (39.16-166.54)      | 0.940        | 0.151        | 0.529        |
| Procalcitonin, ng/mL                | 0.00-0.05      | 0.70 (0.35-4.45)          | 0.47 (0.22-1.02)          | 0.39 (0.20-1.75)          | 1.18 (0.48-1.48)          | 0.249        | 0.500        | 0.917        |
| <b>Inflammatory Cytokines</b>       |                |                           |                           |                           |                           |              |              |              |
| IFN- $\gamma$ , pg/mL               | 0.00-20.06     | 11.72 (2.41-29.36)        | 10.36 (7.10-20.96)        | 6.77 (3.52-15.76)         | 9.48 (6.84-33.18)         | 0.549        | 0.394        | 0.811        |
| IL-10, pg/ml                        | 0.00-2.31      | 8.21 (7.12-11.05)         | 8.69 (7.12-14.07)         | 5.49 (1.79-7.60)          | 6.59 (4.08-12.27)         | 0.753        | 0.052        | 0.463        |
| IL-2, pg/ml                         | 0.00-4.13      | 0.83 (0.71-1.08)          | 1.15 (0.71-1.95)          | 1.05 (0.71-1.67)          | 1.41 (0.65-1.68)          | 0.685        | 0.598        | 0.194        |
| IL-4, pg/ml                         | 0.00-8.37      | 1.22 (1.03-1.46)          | 1.45 (1.03-3.79)          | 1.44 (1.03-8.74)          | 0.68 (0.33-1.05)          | 0.225        | 0.343        | 0.026        |
| IL-6, pg/ml                         | 0.00-6.61      | 384.41 (229.40-812.99)    | 233.54 (68.59-979.16)     | 225.03 (56.15-751.05)     | 218.79 (131.25-516.12)    | 0.463        | 0.081        | 0.146        |
| TNF- $\alpha$ , pg/ml               | 0.00-33.27     | 9.44 (6.71-48.58)         | 56.38 (1.34-96.63)        | 41.30 (11.09-107.78)      | 13.95 (1.45-36.21)        | 0.063        | 0.173        | 0.829        |
| <b>Immunoglobulins</b>              |                |                           |                           |                           |                           |              |              |              |
| Ig A, mg/dL                         | 100.00-420.00  | 152.50 (115.75-206.25)    | 202.50 (158.25-286.50)    | 234.00 (172.25-378.75)    | 255.50 (199.25-281.75)    | 0.083        | 0.047        | 0.000        |
| Ig G, mg/dL                         | 860.00-1740.00 | 1883.50 (1400.50-2536.50) | 1837.00 (1439.75-2305.75) | 2481.00 (1746.00-3246.50) | 2247.00 (1289.00-2909.25) | 0.989        | 0.134        | 0.531        |
| Ig M, mg/dL                         | 30.00-220.00   | 35.50 (29.75-60.75)       | 61.00 (42.50-76.00)       | 64.50 (52.75-85.50)       | 63.50 (25.25-74.75)       | 0.025        | 0.023        | 0.223        |
| <b>Complement Proteins</b>          |                |                           |                           |                           |                           |              |              |              |
| C3, mg/dL                           | 70.00-140.00   | 90.00 (58.50-101.75)      | 107.50 (86.50-119.50)     | 110.00 (90.25-132.75)     | 96.00 (77.50-108.00)      | 0.154        | 0.056        | 0.540        |
| C4, mg/dL                           | 10.00-40.00    | 18.00 (13.75-25.50)       | 17.00 (12.75-24.25)       | 16.50 (14.00-25.25)       | 13.50 (11.25-24.50)       | 0.438        | 0.476        | 0.262        |

Data are presented with median (IQR). N is the total number of patients with available data. IQR, interquartile range.

P values are obtained by t test, or Wilcoxon test.

hs-CRP, high sensitivity C-reactive protein. IFN, interferon. IL, interleukin. TNF, tumor necrosis factor. Ig, immunoglobulin. C3, complement 3. C4, complement 4.

Data are presented with median (IQR). N is the total number of patients with available data. IQR, interquartile range. P values are obtained by t test, or Wilcoxon test. hs-CRP, high sensitivity C-reactive protein. IFN, interferon. IL, interleukin. TNF, tumor necrosis factor. Ig, immunoglobulin. C3, complement 3. C4, complement 4.

**Table S6** Biochemical findings in patients with COVID-19 who received CRRT therapy

| Biochemical Indicators    | Norma Range   | CRRT_0w (N=6)              | CRRT_1w (N=6)               | CRRT_2w (N=6)              | CRRT_3w (N=6)              | P (0 vs. 1w) | P (0 vs. 2w) | P (0 vs. 3w) |
|---------------------------|---------------|----------------------------|-----------------------------|----------------------------|----------------------------|--------------|--------------|--------------|
| Blood Lactic Acid, mmol/L | 0.50-1.60     | 3.30 (2.85-4.25)           | 2.15 (1.83-2.63)            | 1.60 (1.48-2.33)           | 1.50 (1.00-1.95)           | 0.006        | 0.004        | 0.001        |
| D-dimer, ug/L FEU         | 0.00-700.00   | 7656.50 (2077.00-18670.50) | 10680.00 (3124.00-15579.25) | 8329.00 (2847.50-16773.75) | 5481.50 (3830.75-17970.00) | 0.345        | 0.978        | 0.778        |
| Urea, mmol/L              | 3.60-9.50     | 18.73 (10.33-31.30)        | 6.47 (4.33-19.33)           | 9.37 (6.44-16.85)          | 8.96 (5.50-13.17)          | 0.006        | 0.015        | 0.048        |
| Uric acid, umol/L         | 208.00-428.00 | 252.00 (137.25-453.50)     | 100.00 (58.00-161.50)       | 80.50 (63.50-135.25)       | 125.00 (62.75-167.25)      | 0.018        | 0.020        | 0.050        |
| Creatinine, umol/L        | 57.00-111.00  | 163.50 (53.00-544.25)      | 59.50 (47.25-208.75)        | 77.00 (51.75-187.75)       | 112.00 (42.50-241.25)      | 0.028        | 0.075        | 0.229        |
| eGFR (EPI-Cr)             |               | 31.38 (9.40-102.13)        | 83.12 (27.86-105.47)        | 73.80 (32.25-100.88)       | 52.98 (17.16-101.49)       | 0.050        | 0.113        | 0.678        |
| Globulin, g/L             | 20.00-40.00   | 33.60 (28.45-39.28)        | 31.95 (27.45-39.93)         | 37.55 (34.33-45.70)        | 35.70 (31.78-41.55)        | 0.857        | 0.039        | 0.591        |
| Albumin, g/L              | 40.00-55.00   | 35.30 (31.50-37.35)        | 36.80 (33.45-39.18)         | 36.30 (34.88-40.80)        | 36.90 (33.43-40.68)        | 0.456        | 0.241        | 0.249        |
| ALT, U/L                  | 9.00-50.00    | 17.00 (13.50-27.75)        | 19.00 (14.25-41.75)         | 17.50 (14.00-31.50)        | 24.00 (14.75-50.75)        | 0.525        | 0.884        | 0.387        |
| AST, U/L                  | 15.00-40.00   | 32.00 (25.75-34.25)        | 32.50 (15.75-97.00)         | 36.50 (26.00-70.25)        | 36.50 (29.25-105.25)       | 0.600        | 0.132        | 0.178        |
| Total Bilirubin, umol/L   | 0.00-26.00    | 17.70 (5.28-42.38)         | 36.15 (14.88-61.23)         | 23.05 (10.58-61.23)        | 33.25 (12.18-80.88)        | 0.017        | 0.338        | 0.096        |
| Hemoglobin, g/L           | 131.00-172.00 | 92.00 (85.50-101.50)       | 91.50 (83.75-101.00)        | 88.00 (80.50-91.75)        | 78.50 (70.75-85.25)        | 0.704        | 0.116        | 0.029        |
| Hematocrit, %             | 38.00-50.80   | 27.35 (24.70-31.00)        | 27.70 (24.58-31.88)         | 25.70 (23.73-29.18)        | 22.95 (21.23-26.40)        | 0.960        | 0.454        | 0.051        |
| Blood platelet, x10E9/L   | 83.00-303.00  | 90.00 (58.50-120.25)       | 76.50 (64.25-110.00)        | 77.50 (65.75-106.50)       | 80.00 (33.25-133.75)       | 0.682        | 0.542        | 0.680        |
| Sodium, mmol/L            | 137.00-147.00 | 140.00 (137.75-149.50)     | 139.50 (135.00-140.25)      | 137.50 (133.75-139.25)     | 138.50 (136.75-139.25)     | 0.221        | 0.081        | 0.224        |
| Potassium, mmol/L         | 3.50-5.30     | 4.28 (3.99-4.76)           | 4.40 (3.93-4.62)            | 4.28 (4.05-4.43)           | 4.16 (4.09-4.28)           | 0.907        | 0.562        | 0.493        |
| Total Calcium, mmol/L     | 2.11-2.52     | 2.00 (1.84-2.20)           | 2.15 (2.04-2.32)            | 2.30 (2.17-2.39)           | 2.30 (2.20-2.36)           | 0.069        | 0.006        | 0.007        |

Data are presented with median (IQR). N is the total number of patients with available data. IQR, interquartile range. P values are obtained by t test, or Wilcoxon test. ALT, alanine aminotransferase. AST, aspartate aminotransferase.
